# Supplementary material for: Controls on soil organic carbon stocks in tidal marshes along an estuarine salinity gradient
Source: Copernicus journal article supplement (doi:10.5194/bg-13-6611-2016), 2016-12-16
Supplement: Supplementary file 1 [file bg-13-6611-2016-supplement.zip]

**Table S1: GPS coordinates of the sample locations**

|                  | Low marsh                          | High marsh                          |
|------------------|------------------------------------|-------------------------------------|
| Freshwater marsh | 51° 7' 3.12" N<br>4° 16' 5.42" E   | 51° 7' 5.78" N<br>4° 16' 17.75" E   |
| Brackish marsh   | 51° 24' 10.71" N<br>4° 6' 22.18" E | 51° 24' 17.47" N<br>4° 6' 22.46" E  |
| Saltmarsh        | 51° 21' 0.08" N<br>3° 43' 14.81" E | 51° 20' 59.15" N<br>3° 43' 10.60" E |

**Table S2: Average values ( $\pm$  standard deviation) for aboveground, belowground (maximum root depth is given in brackets (m)) and total biomass, biomass production, organic carbon and nitrogen concentration (%), C:N ratio as well as the  $\delta^{13}\text{C}$  signal (‰) for vegetation at the study sites.**

|                     | Vegetation type                           |              | Biomass (g DW m <sup>-2</sup> ) | Annual biomass production (g DW m <sup>-2</sup> yr <sup>-1</sup> ) <sup>A</sup> | Organic carbon % | Nitrogen %      | C:N             | $\delta^{13}\text{C}$ (‰) |
|---------------------|-------------------------------------------|--------------|---------------------------------|---------------------------------------------------------------------------------|------------------|-----------------|-----------------|---------------------------|
| Freshwater low      | <i>P. australis</i>                       | Above-ground | 2775 $\pm$ 858                  | 2775 $\pm$ 858                                                                  | 45.7 $\pm$ 0.5   | 1.12 $\pm$ 0.03 | 47.5 $\pm$ 2.0  | -26.3 $\pm$ 0.2           |
|                     |                                           | Litter       | -                               | -                                                                               | 45.2 $\pm$ 0.8   | 1.00 $\pm$ 0.10 | 53.3 $\pm$ 7.6  | -26.6 $\pm$ 0.2           |
|                     |                                           | Below-ground | 6400 $\pm$ 1943 (0.8m)          | 4352 $\pm$ 1321                                                                 | 42.1 $\pm$ 1.0   | 0.83 $\pm$ 0.11 | 61.3 $\pm$ 9.6  | -26.2 $\pm$ 0.2           |
|                     |                                           | Total        | 9175 $\pm$ 2124                 |                                                                                 |                  |                 |                 |                           |
| Freshwater high     | <i>Salix</i> (leaves)<br><i>U. dioica</i> | Above-ground | 215 $\pm$ 72                    | 215 $\pm$ 72                                                                    | 42.9 $\pm$ 1.6   | 1.60 $\pm$ 0.02 | 31.9 $\pm$ 1.2  | -30.5 $\pm$ 0.5           |
|                     |                                           | Above-ground | 202 $\pm$ 146                   | 202 $\pm$ 146                                                                   | 43.1 $\pm$ 0.6   | 1.25 $\pm$ 0.03 | 40.7 $\pm$ 1.8  | -29.6 $\pm$ 0.3           |
|                     |                                           | Below-ground | 160 $\pm$ 92 (0.35m)            | 34 $\pm$ 19                                                                     | 42.1 $\pm$ 0.7   | 1.33 $\pm$ 0.01 | 36.8 $\pm$ 0.2  | -29.8 $\pm$ 0.1           |
|                     |                                           | Total        | 577 $\pm$ 187                   |                                                                                 |                  |                 |                 |                           |
| Brackish water low  | <i>E. athericus</i>                       | Above-ground | 2331 $\pm$ 560                  | 3754 $\pm$ 902                                                                  | 45.0 $\pm$ 0.4   | 0.96 $\pm$ 0.03 | 54.6 $\pm$ 2.6  | -26.9 $\pm$ 0.3           |
|                     |                                           | Below-ground | 25 $\pm$ 8 (0.40m)              | 88 $\pm$ 28                                                                     | 34.4 $\pm$ 4.0   | 0.55 $\pm$ 0.03 | 73.1 $\pm$ 7.8  | -28.3 $\pm$ 0.4           |
|                     |                                           | Total        | 2356 $\pm$ 560                  |                                                                                 |                  |                 |                 |                           |
| Brackish water high | <i>E. athericus</i>                       | Above-ground | 1746 $\pm$ 295                  | 2811 $\pm$ 475                                                                  | 44.4 $\pm$ 0.7   | 0.96 $\pm$ 0.06 | 54.4 $\pm$ 2.1  | -27.0 $\pm$ 0.3           |
|                     |                                           | Below-ground | 43 $\pm$ 14 (0.20m)             | 151 $\pm$ 49                                                                    | 35.2 $\pm$ 3.5   | 0.58 $\pm$ 0.04 | 68.5 $\pm$ 10.8 | -27.9 $\pm$ 0.4           |
|                     |                                           | Total        | 1789 $\pm$ 295                  |                                                                                 |                  |                 |                 |                           |
| Saltwater low       | <i>S. anglica</i>                         | Above-ground | 680 $\pm$ 163                   | 1333 $\pm$ 319                                                                  | 39.5 $\pm$ 0.8   | 1.56 $\pm$ 0.10 | 29.6 $\pm$ 2.7  | -14.0 $\pm$ 0.02          |
|                     |                                           | Below-ground | 1728 $\pm$ 399 (0.45m)          | 2177 $\pm$ 503                                                                  | 40.4 $\pm$ 1.7   | 1.19 $\pm$ 0.12 | 40.0 $\pm$ 4.8  | -13.5 $\pm$ 0.3           |
|                     |                                           | Total        | 2408 $\pm$ 431                  |                                                                                 |                  |                 |                 |                           |
| Saltwater high      | Mixed vegetation <sup>B</sup>             | Above-ground | 1214 $\pm$ 331                  | 1748 $\pm$ 477                                                                  | 40.3 $\pm$ 0.3   | 1.75 $\pm$ 0.04 | 26.9 $\pm$ 0.9  | -24.7 $\pm$ 0.3           |
|                     |                                           | Below-ground | 11 $\pm$ 5 (0.45m)              | 22 $\pm$ 10                                                                     | 36.8 $\pm$ 1.9   | 1.67 $\pm$ 0.07 | 25.7 $\pm$ 0.9  | -27.4 $\pm$ 0.2           |
|                     |                                           | Total        | 1225 $\pm$ 331                  |                                                                                 |                  |                 |                 |                           |

Notes: <sup>A</sup>Turnover rates are presented in table S3, <sup>B</sup>*Atriplex portulacoides*, *Limonium vulgare*, *Triglochin maritima*, *Elymus athericus*, *Puccinellia maritima*

**Table S3: Turnover rates for above- and belowground biomass at the study sites. Vegetation type is given in table S2.**

**Aboveground biomass**

| Site                        | Turnover rate (yr <sup>-1</sup> ) | Reference                     | Remark                                                                                                               |
|-----------------------------|-----------------------------------|-------------------------------|----------------------------------------------------------------------------------------------------------------------|
| Freshwater low              | 1                                 | Soetaert <i>et al.</i> (2004) | -                                                                                                                    |
| Freshwater high             | 1                                 | -                             | As only fallen vegetation is sampled the turnover rate is assumed to be 1 /yr                                        |
| Brackish water low and high | 1.61                              | Groenendijk (1984)            | Marsh near Krabbendijke (Eastern Scheldt), calculated based on the paired-plot data                                  |
|                             |                                   | Wolff <i>et al.</i> (1979)    | Marsh near Stroodorpepolder (Eastern Scheldt), based on max biomass and biomass production                           |
| Saltwater low               | 1.96                              | Gray & Benham (1990)          | Tidal marsh in the UK, based on primary production                                                                   |
|                             |                                   | Groenendijk (1984)            | Marsh near Krabbendijke (Eastern Scheldt), calculated based on the paired-plot data                                  |
| Saltwater high              | 1.44                              | Groenendijk (1984)            | <i>Triglochin maritima</i> , marsh near Krabbendijke (Eastern Scheldt), calculated based on the single-plot data     |
|                             |                                   | Wolff <i>et al.</i> (1979)    | <i>Elymus athericus</i> , marsh near Stroodorpepolder (Eastern Scheldt), based on max biomass and biomass production |

**Belowground biomass**

| Site                        | Turnover rate (yr <sup>-1</sup> ) | Reference                          | Remark                                                                                                              |
|-----------------------------|-----------------------------------|------------------------------------|---------------------------------------------------------------------------------------------------------------------|
| Freshwater low              | 0.68                              | Soetaert <i>et al.</i> , 2004)     | Average value for roots and rhizomes                                                                                |
| Freshwater high             | 0.21                              | Gill & Jackson (2000)              | <i>Salix bebbiana</i> (Canada);<br><i>Salix spp.</i> (Alaska)                                                       |
| Brackish water low and high | 3.5                               | Bouma <i>et al.</i> (2002)         | Based on root ingrowth cores, marsh near Waarde (Western Scheldt)                                                   |
| Saltwater low               | 1.26                              | Bouma <i>et al.</i> (2002)         | Based on root ingrowth cores, marsh near Waarde (Western Scheldt)                                                   |
|                             |                                   | Gray & Benham (1990)               | Tidal marsh in the UK, based on primary production                                                                  |
| Saltwater high              | 1.99                              | Bouma <i>et al.</i> (2002)         | <i>E. athericus</i> , based on root ingrowth cores, marsh near Waarde (Western Scheldt)                             |
|                             |                                   | Groenendijk & Vink-Lievaart (1987) | <i>Triglochin maritima</i> , average for 0-60 cm depth, Eastern Scheldt, based on biomass production / max. biomass |

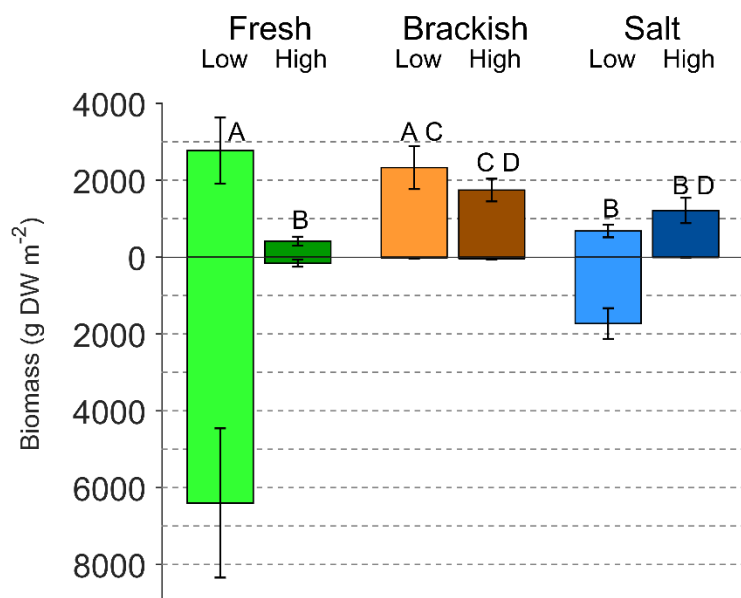

**Figure S1: Total above- and belowground biomass for the study sites (g dry weight m<sup>-2</sup>), with upward pointing bars representing aboveground biomass and downward pointing bars representing belowground biomass (data is provided in table S2). Standard deviations for aboveground biomass are calculated based on 5 replicates, for root biomass on 3 replicates. Sample locations that do not share a letter have significantly ( $p < 0.05$ ) different aboveground biomass.**

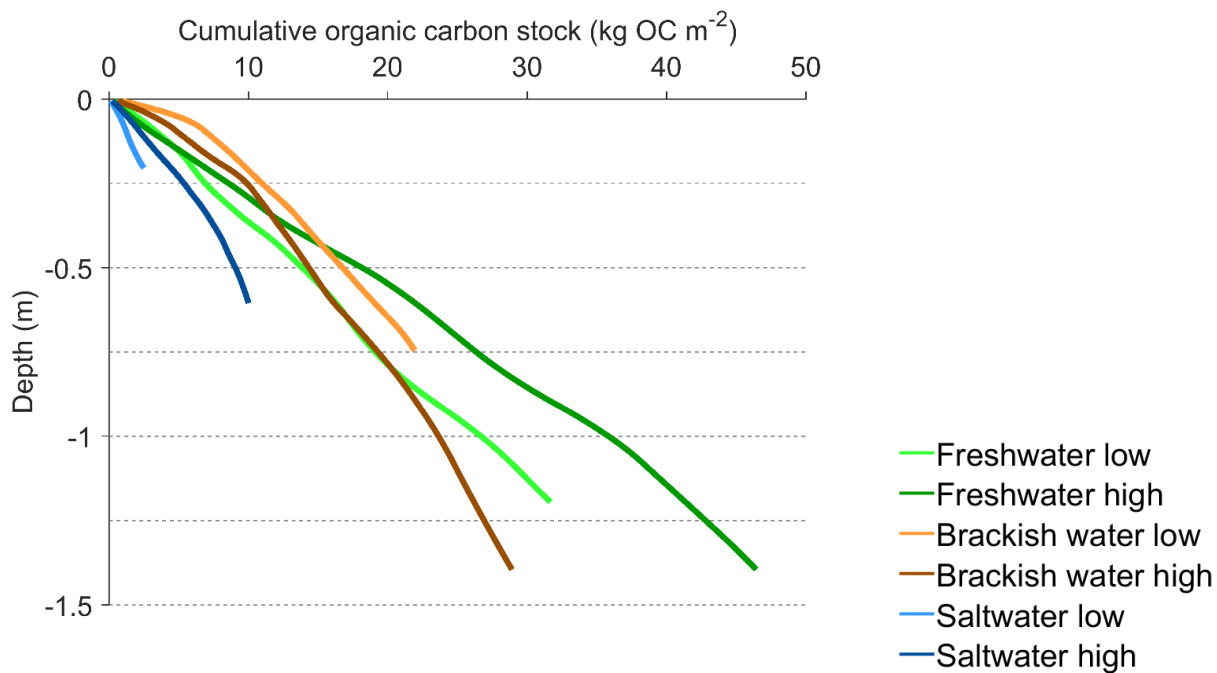

**Figure S2: Depth profiles of the cumulative organic carbon stock for depth intervals of 0.01m. No standard deviations are shown to improve readability.**

5

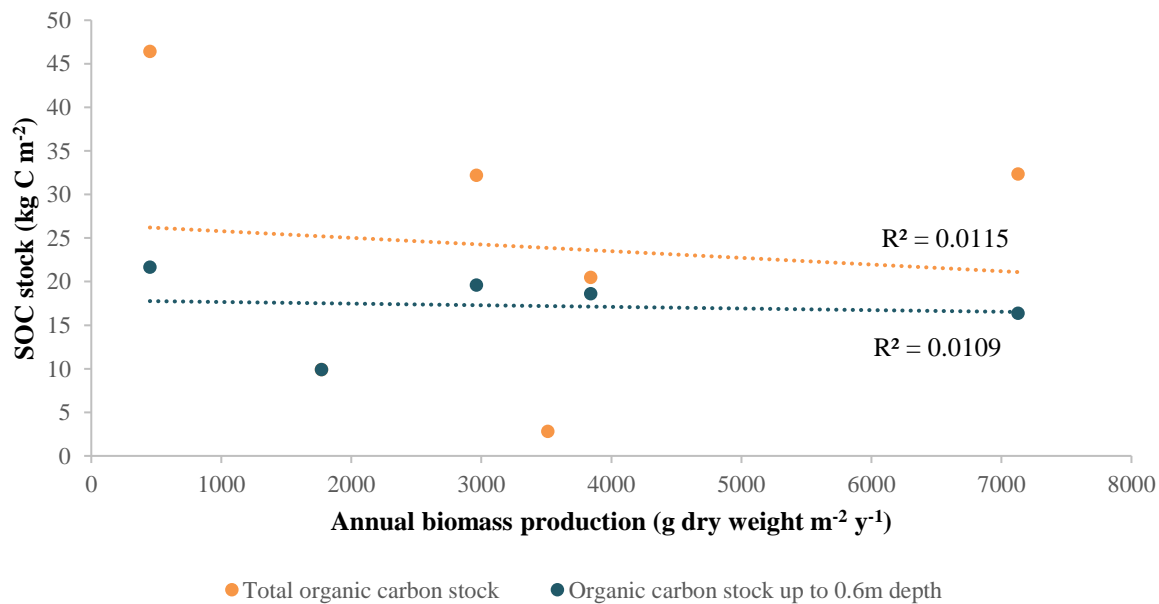

**Figure S3: Relationship between the total annual biomass production (above- and belowground) and soil organic carbon stocks, for both total stocks and stocks down to 0.6m depth.**

## References

- Bouma, T. J., Hengst, K., Koutstaal, B. P. and Soelen, J. Van: Estimating root lifespan of two grasses at contrasting elevation in a salt marsh by applying vitality staining on roots from in-growth cores, *Plant Ecol.*, 165, 235–245, 2002.
- Gill, R. A. and Jackson, R. B.: Global patterns of root turnover for terrestrial ecosystems, *New Phytol.*, 147, 13–31, 2000.
- 5 Gray, A. J. and Benham, P. E. M., Eds.: *Spartina anglica* - a research review, HMSO, London., 1990.
- Groenendijk, A. M.: Primary production of 4 dominant salt-marsh angiosperms in the southwestern Netherlands, *Vegetatio*, 57(2/3), 143–152, 1984.
- Groenendijk, A. M. and Vink-Lievaart, M. A.: Primary production and biomass on a Dutch salt marsh: emphasis on the below-ground component, *Vegetatio*, 70, 21 – 17, 1987.
- 10 Soetaert, K., Hoffmann, M., Meire, P., Starink, M., Van Oevelen, D., Van Regenmortel, S. and Cox, T.: Modeling growth and carbon allocation in two reed beds (*Phragmites australis*) in the Scheldt estuary, *Aquat. Bot.*, 79, 211–234, doi:10.1016/j.aquabot.2004.02.001, 2004.
- Wolff, W. J., Van Eeden, M. J. and Lammens, E.: Primary production and import of particulate organic matter on a salt marsh in The Netherlands, *Netherlands J. Sea Res.*, 13(2), 242–255, 1979.
