# Supplementary material for: Controls on soil organic carbon stocks in tidal marshes along an estuarine salinity gradient
Source: Copernicus journal article supplement (doi:10.5194/bg-13-6611-2016), 2016-12-16
Supplement: Supplementary file 2 [file bg-13-6611-2016-supplement.zip]

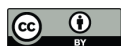

## *Supplement of*

# **Controls on soil organic carbon stocks in tidal marshes along an estuarine salinity gradient**

**Marijn Van de Broek et al.**

*Correspondence to:* Marijn Van de Broek (marijn.vandebroek@kuleuven.be)

- bg-13-6611-2016-supplement-title-page.pdf
- Van de Broek et al. 2016, Supplementary information
  - Van de Broek et al. 2016, Bulk density.xlsx
  - Van de Broek et al. 2016, Grain size data.xlsx
  - Van de Broek et al. 2016, SOC, d13C and CN data.xlsx
  - Van de Broek et al. 2016, Supplementary information.pdf

The copyright of individual parts of the supplement might differ from the CC-BY 3.0 licence.
