# Supplementary material for: Controls on soil organic carbon stocks in tidal marshes along an estuarine salinity gradient
Source: Copernicus journal article supplement (doi:10.5194/bg-13-6611-2016), 2016-12-16
Supplement: Supplementary file 3 [file bg-13-6611-2016-supplement.zip]

Archive with 6 entries (5 files):
- Van de Broek et al. 2016, Supplementary information/
- Van de Broek et al. 2016, Supplementary information/Van de Broek et al. 2016, Bulk density.xlsx
- Van de Broek et al. 2016, Supplementary information/Van de Broek et al. 2016, Supplementary information.pdf
- Van de Broek et al. 2016, Supplementary information/Van de Broek et al. 2016, SOC, d13C and CN data.xlsx
- Van de Broek et al. 2016, Supplementary information/Van de Broek et al. 2016, Grain size data.xlsx
- bg-13-6611-2016-supplement-title-page.pdf
