# Supplementary material for: Controls on soil organic carbon stocks in tidal marshes along an estuarine salinity gradient
Source: Copernicus journal article supplement (doi:10.5194/bg-13-6611-2016), 2016-12-16
Supplement: Supplementary file 3 [file bg-13-6611-2016-supplement.zip › Van de Broek et al. 2016, Supplementary information/Van de Broek et al. 2016, Bulk density.xlsx]

## Sheet: BD
This sheet contains the bulk density data from Van de Broek et al. (2016), Biogeosciences,
Controls on soil organic carbon stocks in tidal marshes along an estuarine salinity gradient.
Samples were collected using a gouge auger, by collecting the soil at selected 0.05m intervals
The average values and standard deviations are based on the analysis of 3 replicate soil cores
Contact: Marijn.vandebroek@kuleuven.be
Depth intervals (m)			Freshwater marsh low			Freshwater marsh high			Brackish marsh low			Brackish marsh high			Saltmarsh low			Saltmarsh high
Upper depth	Lower depth		BD (g/cm³)	Standard dev (g/cm³)		BD (g/cm³)	Standard dev (g/cm³)		BD (g/cm³)	Standard dev (g/cm³)		BD (g/cm³)	Standard dev (g/cm³)		BD (g/cm³)	Standard dev (g/cm³)		BD (g/cm³)	Standard dev (g/cm³)
0	0.05		0.435667	0.111008		0.450148	0.0257295		0.989027	0.0395285		0.435892	0.00682439		0.650544	0.100699		0.512708	0.0770658
0.1	0.15		0.40777	0.0242022		0.51035	0.0267303		0.891939	0.0356481		0.668364	0.010464		0.596634	0.0501332		0.638539	0.0306614
0.2	0.25		0.277332	0.0323149		0.481857	0.0319096		0.794851	0.0442523		0.900835	0.114983		0.64509	0.0684753		0.68151	0.0803646
0.3	0.35		0.334724	0.0440864		0.402163	0.0327429		0.837435	0.0385747		1.02218	0.0904438		1.04714	0.0820231		0.808146	0.0929846
0.4	0.45		0.413929	0.0577065		0.520631	0.0452547		0.880019	0.0319021		1.14352	0.0560266		1.21038	0.0292837		0.865726	0.0466743
0.5	0.55		0.411049	0.0697069		0.598021	0.049068		0.886312	0.0433371		1.16593	0.0252444					1.23839	0.187665
0.7	0.75		0.327766	0.0306488		0.524878	0.0494867		0.970037	0.108435		1.09961	0.0408818					1.09626	0.107431
0.9	0.95		0.57092	0.13222		0.674946	0.0500591		1.16432	0.0848033		1.06125	0.0406739					1.23788	0.114203
1.1	1.15		0.452918	0.0153103		0.845201	0.0587545		1.35861	0.0512348		1.02288	0.0404649					1.17714	0.110228
1.5	1.55		0.771688	0.207952		0.835721	0.123094					0.981926	0.0451708					1.34738	0.229623
