# Supplementary material for: Controls on soil organic carbon stocks in tidal marshes along an estuarine salinity gradient
Source: Copernicus journal article supplement (doi:10.5194/bg-13-6611-2016), 2016-12-16
Supplement: Supplementary file 3 [file bg-13-6611-2016-supplement.zip › Van de Broek et al. 2016, Supplementary information/Van de Broek et al. 2016, SOC, d13C and CN data.xlsx]

## Sheet: Blad1
This sheet contains the soil organic carbon data from Van de Broek et al. (2016), Biogeosciences,
Controls on soil organic carbon stocks in tidal marshes along an estuarine salinity gradient.
Samples were collected at 0.03m depth intervals. Each value in this tabel contains the data for a 0.03m interval
e.g. Average depth -0.015 contains the OC% for the interval 0 - 0.03m depth
Average OC%: the average organic carbon concentration (%) of three replicates
OC std dev: standard deviation based on 3 replicates
CN ratio: the molecular Carbon:Nitrogen ratio
average δ13C (‰): the average d13C signal in per mil based on 3 replicates
Contact: Marijn.vandebroek@kuleuven.be
Freshwater low
Average depth (m)	Average %OC	OC Std dev	Average CN ratio	Std CN dev	average δ13C (‰)	δ13C std dev (‰)
-0.015	8.26645	0.658927	13.2549	0.666327	-27.4161	0.181907
-0.105	6.96916	1.21908	12.6598	0.194433	-27.6996	0.225225
-0.195	6.15928	2.11946	13.3841	0.460241	-27.7141	0.0529593
-0.285	8.2731	0.913124	12.9899	0.278221	-27.8738	0.276335
-0.375	8.63344	1.56905	13.6618	0.227823	-27.1176	0.155131
-0.465	6.14513	0.590254	14.8342	0.273582	-27.7923	0.0760341
-0.555	5.87795	1.03456	15.146	0.727145	-27.424	0.318518
-0.645	4.95141	1.03956	14.9967	0.777642	-27.4344	0.182681
-0.735	6.4679	0.230059	16.0986	0.581422	-26.599	0.176252
-0.915	6.06581	0.341868	16.5438	0.111694	-26.2926	0.132119
-1.095	5.3402	0.536435	18.2014	0.293451	-25.9406	0.173585
-1.275	5.1057	0.161861	17.106	0.701704	-25.6938	0.121937
-1.455	4.28268	0.872155	21.3365	3.96156	-25.5037	0.483268
Freshwater high
Average depth (m)	Average %OC	OC Std dev	Average CN ratio	Std CN dev	average δ13C (‰)	δ13C std dev (‰)
-0.015	6.00865	0.879407	13.6594	0.433752	-28.4141	0.132805
-0.105	7.00834	1.30612	13.8458	0.39011	-29.0053	0.822683
-0.195	7.38563	1.72805	13.9723	0.774262	-28.489	0.469278
-0.285	7.75762	1.42556	13.6606	0.256747	-28.8733	0.799491
-0.375	8.30507	2.36887	14.2037	0.45794	-28.2926	0.550423
-0.465	8.1037	3.02303	14.1786	1.18578	-28.4421	0.900103
-0.555	6.00184	0.950512	14.6568	0.244247	-27.3034	0.265064
-0.645	5.50302	0.716315	16.6017	1.81892	-26.8161	0.0882827
-0.735	5.74626	0.121689	16.8539	1.08911	-26.0659	0.0589906
-0.915	6.43056	0.125888	17.1177	1.64995	-26.1815	0.301202
-1.095	3.14484	0.196273	14.6505	0.809855	-26.8213	0.513326
-1.275	3.09824	0.16269	13.9841	0.994903	-26.8109	0.328499
-1.455	2.61959	0.191886	12.5658	0.412631	-26.6665	0.149402
Brackish water low
Average depth (m)	Average %OC	OC Std dev	Average CN ratio	Std CN dev	average δ13C (‰)	δ13C std dev (‰)
-0.015	9.77079	2.41973	13.8767	0.722776	-28.2667	0.0979856
-0.105	3.17446	0.686932	12.7899	0.248005	-26.5472	0.402335
-0.195	3.0859	0.36408	13.4576	0.705065	-26.5111	0.0685668
-0.285	3.29402	0.125328	13.4029	0.476076	-25.8187	0.471697
-0.375	2.38572	0.196618	13.9485	0.446056	-24.9664	0.264351
-0.465	2.54014	0.228786	14.4184	0.734848	-23.3526	0.130009
-0.555	2.43153	0.0309793	14.2883	0.394014	-23.5169	0.438648
-0.645	2.48157	0.107941	13.3753	0.198227	-22.3504	0.210692
-0.735	1.72759	0.412873	14.0038	0.164233	-23.2227	0.174783
Brackish water high
Average depth (m)	Average %OC	OC Std dev	Average CN ratio	Std CN dev	average δ13C (‰)	δ13C std dev (‰)
-0.015	14.2177	1.55295	14.0301	0.473782	-28.1683	0.105114
-0.105	4.59646	0.194968	12.0219	0.297294	-27.262	0.243427
-0.195	4.40579	0.0379643	12.3532	0.130039	-25.6706	0.249564
-0.285	1.84262	0.524952	14.2277	0.298443	-25.7094	0.553923
-0.375	1.65834	0.0754574	14.0444	0.743758	-25.3676	0.0922508
-0.465	1.44697	0.167588	14.6491	0.305138	-25.6311	0.351017
-0.555	1.37808	0.0328258	14.1338	0.287471	-25.6166	0.148196
-0.645	2.04942	0.249219	14.6865	0.697044	-25.5292	0.212473
-0.735	1.89842	0.217097	14.7276	0.380144	-25.9495	0.074232
-0.915	1.55343	0.129139	12.0912	0.19424	-24.9969	0.0853521
-1.095	1.22098	0.0584017	12.8857	0.5527	-25.3919	0.2367
-1.275	1.34301	0.205654	12.9425	0.413127	-25.3436	0.0955221
-1.455	1.45557	0.0222197	13.7396	0.441476	-25.6288	0.195055
Saltwater low
Average depth (m)	Average %OC	OC Std dev	Average CN ratio	Std CN dev	average δ13C (‰)	δ13C std dev (‰)
-0.015	2.18192	0.184859	9.91564	1.14738	-21.4355	0.101823
-0.105	1.52006	0.228399	11.8321	1.37046	-22.5041	0.387426
-0.195	2.13881	0.290079	12.144	0.819875	-21.5875	0.500132
-0.285	2.09169	0.287155	10.7363	1.48027	-22.6789	0.601555
-0.375	0.641577	0.233305	11.7173	0.242078	-20.6425	1.12308
Saltwater high
Average depth (m)	Average %OC	OC Std dev	Average CN ratio	Std CN dev	average δ13C (‰)	δ13C std dev (‰)
-0.015	4.72235	0.246323	11.2243	0.197643	-25.5565	0.387991
-0.105	3.05819	0.469435	9.91135	0.778011	-24.4993	0.877643
-0.195	3.28662	0.688327	12.1375	0.531293	-25.0455	0.298511
-0.285	2.41962	0.173937	11.3236	1.08606	-24.5266	0.233255
-0.375	1.76804	0.800651	10.6441	0.442457	-24.4611	0.290397
-0.465	1.13062	0.366527	9.4562	0.117759	-23.9922	0.400359
-0.555	0.712796	0.37051	9.86378	0.642345	-23.7085	0.288021
-0.645	0.59732	0.0724066	9.702	0.857059	-23.9323	1.00897
-0.735	0.723906	0.135442	9.82724	0.426951	-23.8915	0.480833
-0.915	0.484808	0.063259	10.8581	0.699651	-24.142	0.0784889
-1.095	0.560152	0.0495533	11.3682	0.742087	-24.2055	0.564271
-1.275	0.570988	0.201963	12.7874	1.66202	-24.5498	0.359875
